# Supplementary material for: Silencing KIF18B enhances radiosensitivity: identification of a promising therapeutic target in sarcoma
Source: PubMed Central journal article supplement — eBioMedicine. 2020 Oct 7;61:103056. doi: 10.1016/j.ebiom.2020.103056 (PMC7648128; doi:10.1016/j.ebiom.2020.103056), 2020-10-07

# CERTIFICATE OF ENGLISH EDITING

This document certifies that the paper listed below has been edited to ensure that the language is clear and free of errors. The edit was performed by professional editors at Inovelt. The intent of the author's message was not altered in any way during the editing process. The quality of the edit has been guaranteed, with the assumption that our suggested changes have been accepted and have not been further altered without the knowledge of our editors.

TITLE OF THE PAPER: **Silencing KIF18B enhances radiosensitivity: identification of a promising therapeutic target in sarcoma**

AUTHORS: **Wensi Liu**

DATE: **15th, Sep 2020**

Inovelt offers professional English language editing and publication support services to authors engaged in biological and medical research. Through its community of experienced editors, which includes doctors, published scientists, and researchers with peer review experience, Inovelt has successfully helped authors get published in internationally reputed journals. Authors who work with Inovelt are guaranteed excellent language quality and timely delivery.

## Contact Inovelt

[info@inovelt.com](mailto:info@inovelt.com)

+86 21 67783955

[www.inovelt.com](http://www.inovelt.com)

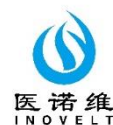

Supplement: mmc10.pdf [file mmc10.pdf]
